# Supplementary material
Source: publisher site journal article supplement (https://www.spandidos-publications.com/7473/downloadSupplementary)
Supplement: Supplementary file 1 [file downloadSupplementary]

## Sheet: Sheet1
Table SXIV. Differentially expressed genes ranked by the semantic similarity of gene ontology in the descending order.
MLN
SCRG1
UPK1A
CNFN
IVL
BRINP1
NRSN1
SFTPB
MAGEC1
MAGEB2
KRT24
BEX1
SEZ6
INHA
SPDYC
FGF19
TGM1
RPRM
BOC
DLK1
HEPACAM2
CPE
CSTA
AXIN2
F2
SBSN
CALCA
KRT4
KRT6C
DNER
LEP
GKN2
CTNND2
UPK3A
WNT7A
WIF1
TP63
CGA
PNLIPRP1
FGB
FGG
ZIC1
CARTPT
AFP
AZU1
SH3GL2
GCG
SPRR3
THBS4
PKP1
ADIPOQ
SRRM4
ORM1
KLK13
ENDOU
MAGEA8
TTR
BAMBI
AGT
IL17A
SCGN
SHISA3
NEUROD1
CNTN1
PCSK2
IL37
APOA1
LRP2
NGFR
KLK5
KRT6A
SVOP
TF
PAEP
SPINK7
ANKRD1
IL36RN
RASD1
POU4F1
HAP1
ERP27
C6orf15
GRP
ADCYAP1
CRLF1
PAK3
GAST
BMP5
PTPRN
SCG5
IGF2
CIDEA
RIMS2
SOHLH1
ZNF750
SLURP1
GKN1
CLDN10
ALB
TRIML2
ADRA1B
APOB
TEX19
CELA2B
SERPINC1
FGF4
CLDN19
TCF23
DPPA2
CTCFL
DEFB4A
SCGB3A1
CA1
SCG2
MYOC
CDC6
KRTDAP
ELANE
CACNA1A
CCL16
NKD1
CEL
C8A
PLCXD3
SPRR2E
IGLL1
APOA2
DLX1
RNF182
VIP
LIN28A
CRYBA2
MUC2
CCL19
SPX
PYY
TGM5
MPO
ASCL1
LMX1A
COL2A1
IGF2BP1
KRT13
CCL21
RGS13
NOTUM
VSTM2L
APOA4
PCSK1
CBLN1
RHCG
SPRR1A
MMP20
SLC18A2
SV2B
TMPRSS11D
DLX2
KLK3
PLA2G1B
SNAP25
C10orf99
GSTA2
ADCY1
KRT14
TEX11
MAGEA4
SLC6A4
FAM9C
TFAP2B
ENPP7
MAL
CD300LG
ALPI
DLX3
DLX4
SYT4
CRTAC1
STAC2
CELA2A
SCNN1B
ALOX15
SERPINI2
FOXN1
GTSF1
KIRREL2
SYP
INSM1
STMN2
PTPRO
UCN3
GABBR2
IL17C
LHX1
CTRC
DEFA5
AQP2
RBPJL
ZFP42
APOA5
NHLH2
TMPRSS15
APOC3
AQP8
PLIN1
PHOX2A
KRT5
CALML3
MYBPHL
STXBP5L
AOX1
CALY
NRXN2
SULT1C3
FGL1
DEFA6
WFDC5
APOH
UBE2QL1
CPA1
CCKBR
DSG1
RLBP1
SERPINB13
MEGF11
RFX6
AMER3
CA4
CHRNB2
PTCH2
TRIM71
KRT15
PRLHR
CERS3
SLC22A11
TPH1
INA
FABP4
GNG13
NEUROD2
SOSTDC1
DLL3
TRPM8
ONECUT1
ABRA
TMPRSS11E
PGLYRP3
NR2E1
CLCA2
PNMA3
GPIHBP1
HAS1
TDRD1
UGT2B11
SYT5
USH1G
ADRB3
PI16
DES
CDK5R2
GAD2
KCNJ8
TACR1
DUSP9
SERPINA5
TGM3
RNASE2
CAPN14
ADH1A
OTOP3
MTTP
REG3G
ADCY2
TGM4
HSD3B1
SULT2A1
SCG3
KCNK3
PAPPA2
SLC18A3
PADI3
CALML5
SAA1
ABCC8
FAT2
SOAT2
CALCR
GPR142
ZIC4
SLC6A17
PLA2G3
RPE65
NEURL1
NGB
ATP4B
GLDC
ELAVL4
MORC1
GBX2
CDH12
CA10
VCX
PRSS1
CLCA4
PAX4
AQP12B
AQP12A
HOXC12
KCNA4
PRND
PIRT
TBX4
DPEP3
SLC13A5
DPYS
CDH22
CLPS
ADH7
HBQ1
KRT9
ST8SIA3
ST18
GLRA2
EVX1
RNASE7
KIF5C
MYBPH
CELA3B
REG1B
GP2
ACSM2B
PRELP
CYP4F22
CADM3
CYP7A1
PODN
SLC39A2
FEV
PRG4
CELF3
DSG4
NLRP7
PNLIPRP2
PNLIP
HOXD11
OBP2B
SERPIND1
CDO1
CA6
KCNB2
PLA2G4E
GALNT9
RBP2
SLC16A12
CYP3A7
GRIK1
PI15
NLRP4
CPA2
KRT12
TMPRSS11A
TAAR1
A2ML1
SERPINA6
ATP4A
CPN2
SERPINA9
AHSG
TUBA3C
GRIK3
GABRA4
ITIH1
SLC17A8
PRSS50
SLC18A1
COL9A3
HS3ST4
PGA5
KIF19
DPP6
HEPHL1
PGBD5
SLC2A2
SUN3
SLC38A3
SCN3A
UGT3A2
GBP6
COX7B2
UNC80
KCNH7
KCNH6
PRODH2
TMEM63C
SLC7A2
GLYATL2
